# Supplementary material for: Co-expression Network Analysis in Carya illinoinensis cvs. ‘Tiny Tim’ and ‘Mahan’ Identifies Cell Wall Remodeling and Inositol Metabolism Modules Associated with Nut Size
Source: Research Square preprint supplement (doi:10.21203/rs.3.rs-7843615/v1), 2025-10-30
Supplement: Supplementary file 1 [file e866d47b11951fa2202d86b6.pdf]

## Supplementary Data

| Collection | 'Mahan'  | 'Tiny Tim' |
|------------|----------|------------|
| 1          | 05/06/22 | 05/06/22   |
| 2          | 05/19/22 | 05/16/22   |
| 3          | 05/31/22 | 05/24/22   |
| 4          | 06/13/22 | 05/31/22   |
| 5          | 06/24/22 | 06/07/22   |
| 6          | 07/06/22 | 06/14/22   |
| 7          | 07/22/22 | 06/21/22   |
| 8          | 07/29/22 | 06/28/22   |
| 9          | 08/10/22 | 07/05/22   |
| 10         | 08/17/22 | 07/22/22   |
| 11         | 08/25/22 | 07/29/22   |
| 12         | 09/07/22 | 08/02/22   |
| 13         | 09/13/22 | 08/09/22   |
| 14         | 09/28/22 | 08/17/22   |
| 15         | 10/12/22 | 08/25/22   |
| 16         | 10/31/22 | 08/30/22   |
| 17         |          | 09/07/22   |
| 18         |          | 09/13/22   |
| 19         |          | 09/28/22   |
| 20         |          | 10/12/22   |

Table S1. Collection dates of samples.

| Sample | Sequence Data Generated (Gb) |
|--------|------------------------------|--------|------------------------------|--------|------------------------------|--------|------------------------------|
| MA1    | 10.37                        | MB1    | 8.28                         | TA1    | 8.32                         | TB1    | 7.34                         |
| MA2    | 8.47                         | MB2    | 8.11                         | TA2    | 7.34                         | TB2    | 7.74                         |
| MA3    | 9.04                         | MB3    | 7.87                         | TA3    | 7.39                         | TB3    | 7.18                         |
| MA4    | 8.82                         | MB4    | 6.28                         | TA4    | 6.75                         | TB4    | 7.03                         |
| MA5    | 7.13                         | MB5    | 8.01                         | TA5    | 7.55                         | TB5    | 7.22                         |
| MA6    | 8.31                         | MB6    | 7.01                         | TA6    | 6.75                         | TB6    | 6.61                         |
| MA7    | 8.06                         | MB7    | 6.89                         | TA7    | 7.03                         | TB7    | 6.35                         |
| MA8    | 8.07                         | MB8    | 8.16                         | TA8    | 8.09                         | TB8    | 6.57                         |
| MA9    | 6.54                         | MB9    | 8.23                         | TA9    | 8.32                         | TB9    | 7.37                         |
| MA10   | 7.33                         | MB10   | 7.86                         | TA10   | 7.09                         | TB10   | 6.62                         |
| MA11   | 8                            | MB11   | 8.27                         | TA11   | 7.16                         | TB11   | 8.45                         |
| MA12   | 7.31                         | MB12   | 7.45                         | TA12   | 7.34                         | TB12   | 8.7                          |
| MA13   | 6.97                         | MB13   | 6.61                         | TA13   | 7.56                         | TB13   | 9.03                         |
| MA14   | 7.79                         | MB14   | 6.84                         | TA14   | 7.46                         | TB15   | 7.75                         |
| MA15   | 7.57                         | MB15   | 8                            | TA15   | 6.66                         | TB16   | 7.56                         |
| MA16   | 9.07                         | MB16   | 7.46                         | TA16   | 6.82                         | TB17   | 7.06                         |
|        |                              |        |                              | TA18   | 8.76                         | TB18   | 8.93                         |
|        |                              |        |                              | TA19   | 7.11                         | TB19   | 9.4                          |
|        |                              |        |                              | TA20   | 7.01                         | TB20   | 7.34                         |

Table S2. Quantity of sequencing data for each sample measured in billions of base pairs (gigabases/Gb).

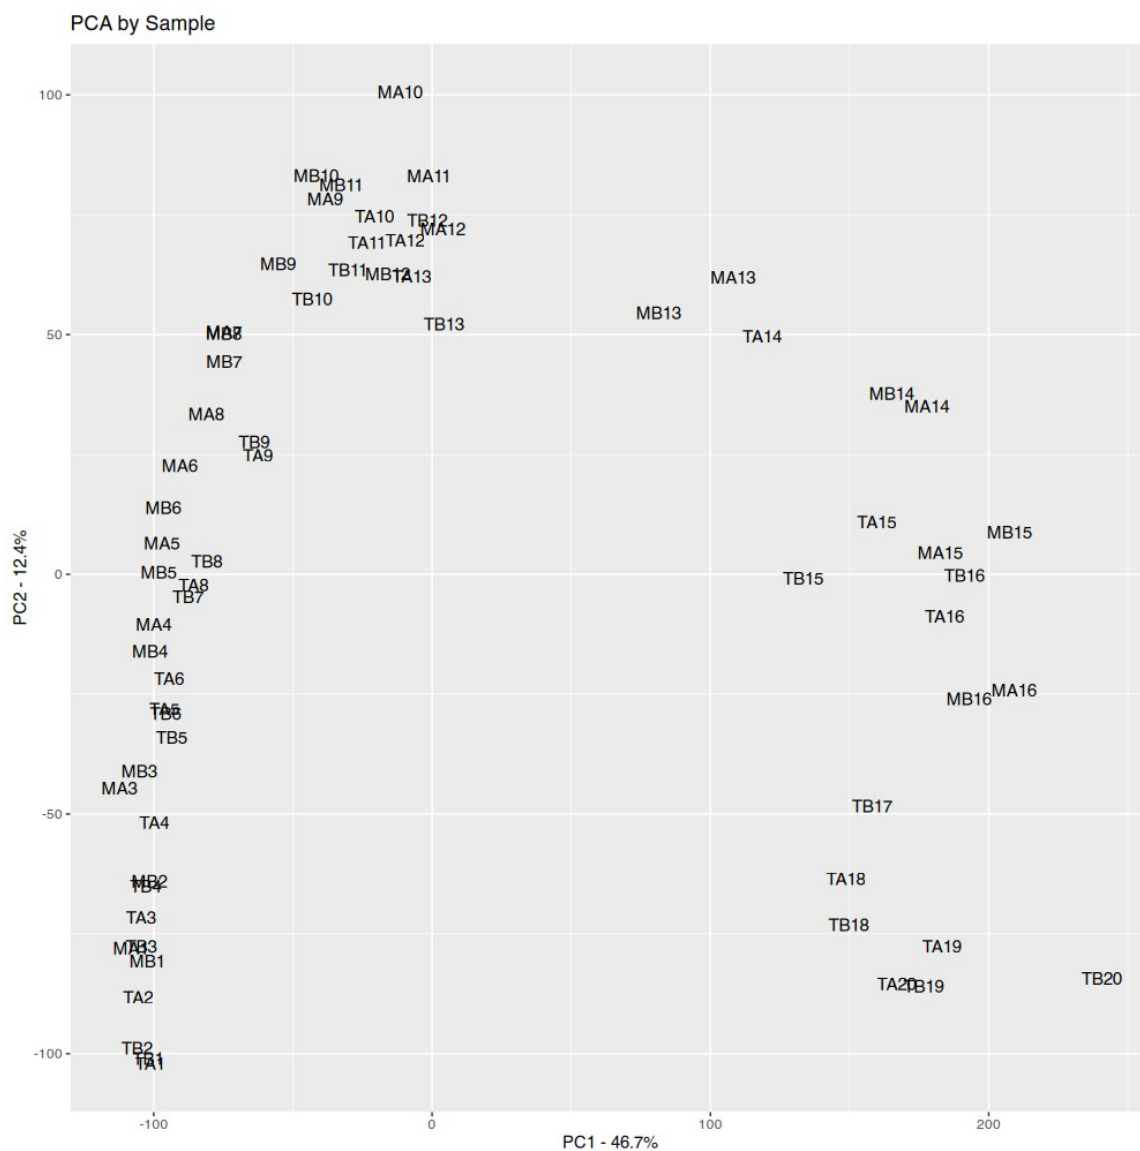

Figure S1. Principal components analysis of TPM and log2 normalized gene expression data. Two outliers, MA2 and TA7, have been removed due to the effect of sample degradation on data reliability.

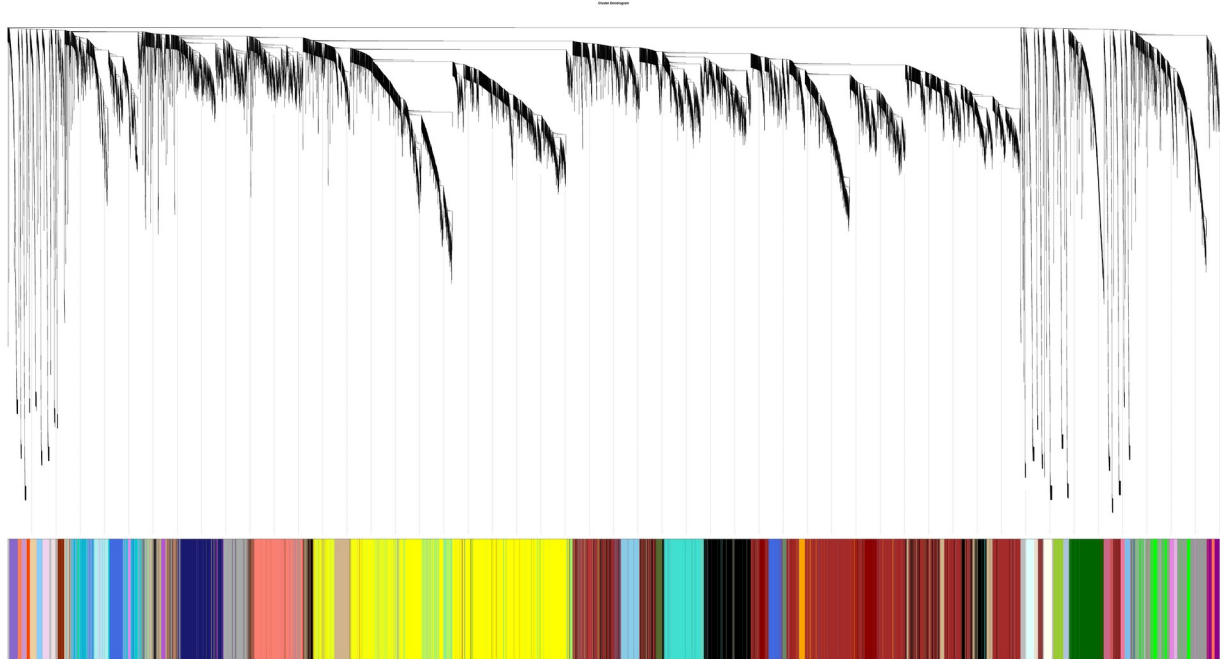

Figure S2. Cluster dendrogram describing the co-expression network constructed from gene expression data. Colors correspond to modules of correlated genes, and genes not assigned to any module are left grey.

| Module        | Size  | Module          | Size | Module          | Size | Module          | Size |
|---------------|-------|-----------------|------|-----------------|------|-----------------|------|
| turquoise     | 10668 | white           | 282  | navajowhite2    | 78   | salmon2         | 52   |
| blue          | 3775  | skyblue         | 257  | maroon          | 77   | palevioletred2  | 51   |
| brown         | 2800  | saddlebrown     | 245  | lightpink4      | 76   | navajowhite1    | 51   |
| yellow        | 2580  | steelblue       | 240  | lavenderblush3  | 75   | magenta4        | 50   |
| green         | 2513  | paleturquoise   | 192  | honeydew1       | 74   | lightpink3      | 49   |
| red           | 1797  | violet          | 187  | antiquewhite4   | 73   | lavenderblush2  | 48   |
| black         | 1350  | darkolivegreen  | 169  | coral1          | 73   | honeydew        | 48   |
| pink          | 1291  | darkmagenta     | 152  | darkseagreen4   | 73   | darkseagreen3   | 47   |
| grey          | 1192  | sienna3         | 134  | coral2          | 72   | mediumpurple4   | 44   |
| magenta       | 931   | yellowgreen     | 119  | mediumorchid    | 69   | coral           | 44   |
| purple        | 709   | skyblue3        | 117  | skyblue2        | 65   | coral3          | 44   |
| greenyellow   | 681   | plum1           | 116  | yellow4         | 65   | antiquewhite2   | 44   |
| tan           | 660   | orangered4      | 114  | skyblue1        | 64   | yellow3         | 43   |
| salmon        | 593   | mediumpurple3   | 109  | plum            | 64   | skyblue4        | 43   |
| cyan          | 570   | lightsteelblue1 | 108  | orangered3      | 63   | pink4           | 42   |
| midnightblue  | 531   | lightcyan1      | 105  | mediumpurple2   | 63   | sienna4         | 42   |
| lightcyan     | 502   | ivory           | 100  | lightsteelblue  | 62   | orangered1      | 40   |
| grey60        | 500   | darkorange2     | 94   | lightcoral      | 61   | mediumpurple1   | 38   |
| lightgreen    | 483   | floralwhite     | 94   | darkolivegreen4 | 60   | lightslateblue  | 38   |
| lightyellow   | 465   | brown4          | 93   | indianred4      | 60   | lightblue4      | 37   |
| royalblue     | 439   | bisque4         | 90   | firebrick4      | 60   | indianred3      | 36   |
| darkred       | 427   | darkslateblue   | 90   | brown2          | 59   | firebrick3      | 36   |
| darkgreen     | 420   | plum2           | 86   | blue2           | 59   | blueviolet      | 34   |
| darkturquoise | 360   | thistle2        | 82   | darkviolet      | 58   | darkolivegreen2 | 34   |
| darkgrey      | 335   | thistle1        | 81   | plum3           | 55   | blue4           | 32   |
| orange        | 321   | salmon4         | 81   | thistle3        | 53   |                 |      |
| darkorange    | 287   | palevioletred3  | 78   | thistle         | 53   |                 |      |

Table S3. Size of each module in number of transcripts.

| Name              | Log <sub>2</sub> Average | ModuleCorrelation | Genotype | pval | Panther Eng                                            |
|-------------------|--------------------------|-------------------|----------|------|--------------------------------------------------------|
| CiPaw.07G040300.1 | 2.704                    | 0.947             | -0.130   |      | LRR RECEPTOR-LIKE SERINE/THREONINE-PROTEIN KINASE HSL2 |
| CiPaw.01G133200.1 | 1.781                    | 0.941             | -0.363   | **   | PROTEIN POP3-RELATED                                   |
| CiPaw.10G070700.1 | 3.300                    | 0.938             | -0.155   |      | CALCIUM-DEPENDENT PROTEIN KINASE 29                    |
| CiPaw.12G051600.1 | 2.436                    | 0.937             | -0.134   |      | O-fucosyltransferase GT106                             |
| CiPaw.11G063600.1 | 3.379                    | 0.935             | -0.405   | **   | THIOREDOXIN-LIKE PROTEIN 4A, 4B                        |
| CiPaw.11G137500.1 | 4.331                    | 0.935             | -0.289   | *    | Plant receptor-like serine/threonine-protein kinase    |
| CiPaw.04G180500.4 | 2.535                    | 0.934             | -0.330   | **   | BETA-HEXOSAMINIDASE                                    |
| CiPaw.10G043800.2 | 4.021                    | 0.933             | -0.283   | *    | HYDROXYPROLINE-RICH GLYCOPROTEIN FAMILY PROTEIN        |
| CiPaw.08G058200.1 | 3.950                    | 0.931             | -0.455   | **   | AUXIN-RESPONSIVE PROTEIN IAA8                          |
| CiPaw.05G096900.1 | 3.275                    | 0.931             | -0.263   | *    | NADH-UBIQUINONE OXIDOREDUCTASE B8 SUBUNIT              |

Table S4. Top 10 transcripts in Module Orange by module correlation.

| Name              | Log <sub>2</sub> Average | ModuleCorrelation | Genotype | pval | Panther Eng                                                 |
|-------------------|--------------------------|-------------------|----------|------|-------------------------------------------------------------|
| CiPaw.02G081900.1 | 3.786                    | 0.969             | -0.284   | *    | WD40 REPEAT PROTEIN PRL1/PRL2-RELATED                       |
| CiPaw.09G205000.1 | 5.040                    | 0.960             | -0.329   | **   | E3 UBIQUITIN-PROTEIN LIGASE HAKAI-RELATED                   |
| CiPaw.04G014900.1 | 3.324                    | 0.957             | -0.255   | *    | VESICLE TRANSPORT V-SNARE 12                                |
| CiPaw.11G067200.1 | 0.962                    | 0.955             | -0.381   | **   | FAD/NAD(P)-BINDING OXIDOREDUCTASE DOMAIN-CONTAINING PROTEIN |
| CiPaw.04G014900.2 | 3.322                    | 0.954             | -0.225   |      | VESICLE TRANSPORT V-SNARE 12                                |
| CiPaw.06G109200.1 | 3.388                    | 0.952             | -0.393   | **   | Polyadenylate-binding/CELf RNA-binding                      |
| CiPaw.11G203100.1 | 3.864                    | 0.948             | -0.216   |      | BNAA10G09820D PROTEIN                                       |
| CiPaw.02G099900.1 | 5.668                    | 0.947             | -0.312   | **   | RIBOSOMAL PROTEIN L5-RELATED                                |
| CiPaw.06G173900.1 | 4.191                    | 0.947             | -0.331   | **   | 60S RIBOSOMAL PROTEIN L3-2                                  |
| CiPaw.15G173300.2 | 2.128                    | 0.942             | -0.316   | **   | TWO-COMPONENT RESPONSE REGULATOR ARR18                      |

Table S5. Top 10 Transcripts in Module Darkred by module correlation.
